# Supplementary material for: LPS-Activated Microglial Cell-Derived Conditioned Medium Protects HT22 Neuronal Cells against Glutamate-Induced Ferroptosis
Source: Int J Mol Sci. 2023 Feb 2;24(3):2910. doi: 10.3390/ijms24032910 (PMC9917809; doi:10.3390/ijms24032910)
Supplement: Supplementary file 1 [file ijms-24-02910-s001.zip › ijms-2086969-supplementary.pdf]

## **Supplementary Materials**

**Supplementary Table S1: Chemicals and reagents used in the study.**

| <b>Chemicals/reagents</b>                                                     | <b>Supplier</b>      | <b>Code</b>              |
|-------------------------------------------------------------------------------|----------------------|--------------------------|
|                                                                               |                      |                          |
| <b>3-(4,5-Dimethyl-2-thiazolyl)-2,5-diphenyl-2H-tetrazolium bromide (MTT)</b> | <b>Sigma-Aldrich</b> | <b>M2128</b>             |
| <b>Antibiotic-Antimycotic (100X)</b>                                          | <b>Thermo Fisher</b> | <b>15240062</b>          |
| <b>Dimethyl sulfoxide (DMSO)</b>                                              | <b>Sigma-Aldrich</b> | <b>472301;<br/>D2650</b> |
| <b>Dulbecco's modified Eagle's medium (DMEM)</b>                              | <b>Thermo Fisher</b> | <b>12100046</b>          |
| <b>Fetal bovine serum (FBS)</b>                                               | <b>Thermo Fisher</b> | <b>16140071</b>          |
| <b>Hanks' Balanced Salt solution (HBSS)</b>                                   | <b>Sigma-Aldrich</b> | <b>H8264</b>             |
| <b>L-Glutamic acid</b>                                                        | <b>Sigma-Aldrich</b> | <b>G1251</b>             |
| <b>Lipopolysaccharides from <i>Escherichia coli</i> O111:B4</b>               | <b>Sigma-Aldrich</b> | <b>L2630</b>             |
| <b>N-(1-Naphthyl)ethylenediamine dihydrochloride</b>                          | <b>Sigma-Aldrich</b> | <b>222488</b>            |
| <b>Propidium iodide (PI)</b>                                                  | <b>Sigma-Aldrich</b> | <b>P4170</b>             |
| <b>Sulfanilamide</b>                                                          | <b>Sigma-Aldrich</b> | <b>S9251</b>             |
| <b><i>tert</i>-Butyl hydroperoxide (t-BuOOH)</b>                              | <b>Sigma-Aldrich</b> | <b>458139</b>            |
| <b>Triton X-100</b>                                                           | <b>Sigma-Aldrich</b> | <b>X100</b>              |
| <b>Trypsin-EDTA</b>                                                           | <b>Thermo Fisher</b> | <b>15400054</b>          |

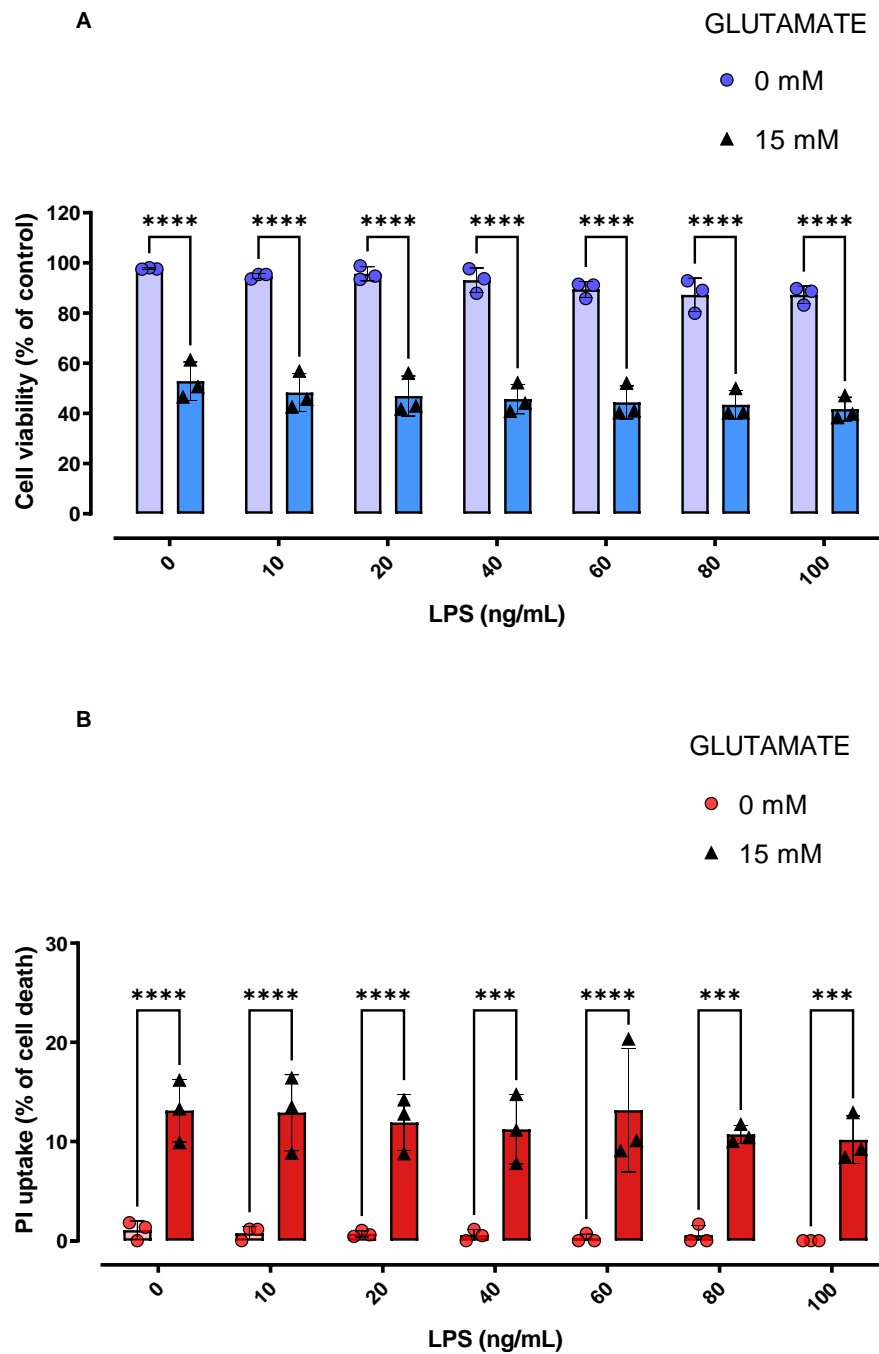

**Supplementary Figure S1. LPS did not induce protection against 15 mM glutamate.** In order to investigate whether LPS would be able to generate a protective response against glutamate-induced ferroptosis, HT22 cells were exposed for 6 h (item 4.5) to different concentrations of LPS and then to 15 mM glutamate for 18 h. The figure shows significant impairment of metabolic cell viability (A - MTT assay) and increased cell death (B - PI assay) induced by 15 mM glutamate. These results were not significantly altered by pre-exposure to LPS (10-100 ng/mL), i.e., no protective effects against 15 mM glutamate were observed. In B, 100% cell death is represented by cells treated with 0.2% Triton X-100 for 20 minutes. \*\*\* $p < 0.001$ ; \*\*\*\* $p < 0.0001$  compared to control group (untreated cells).  $n=3$ .

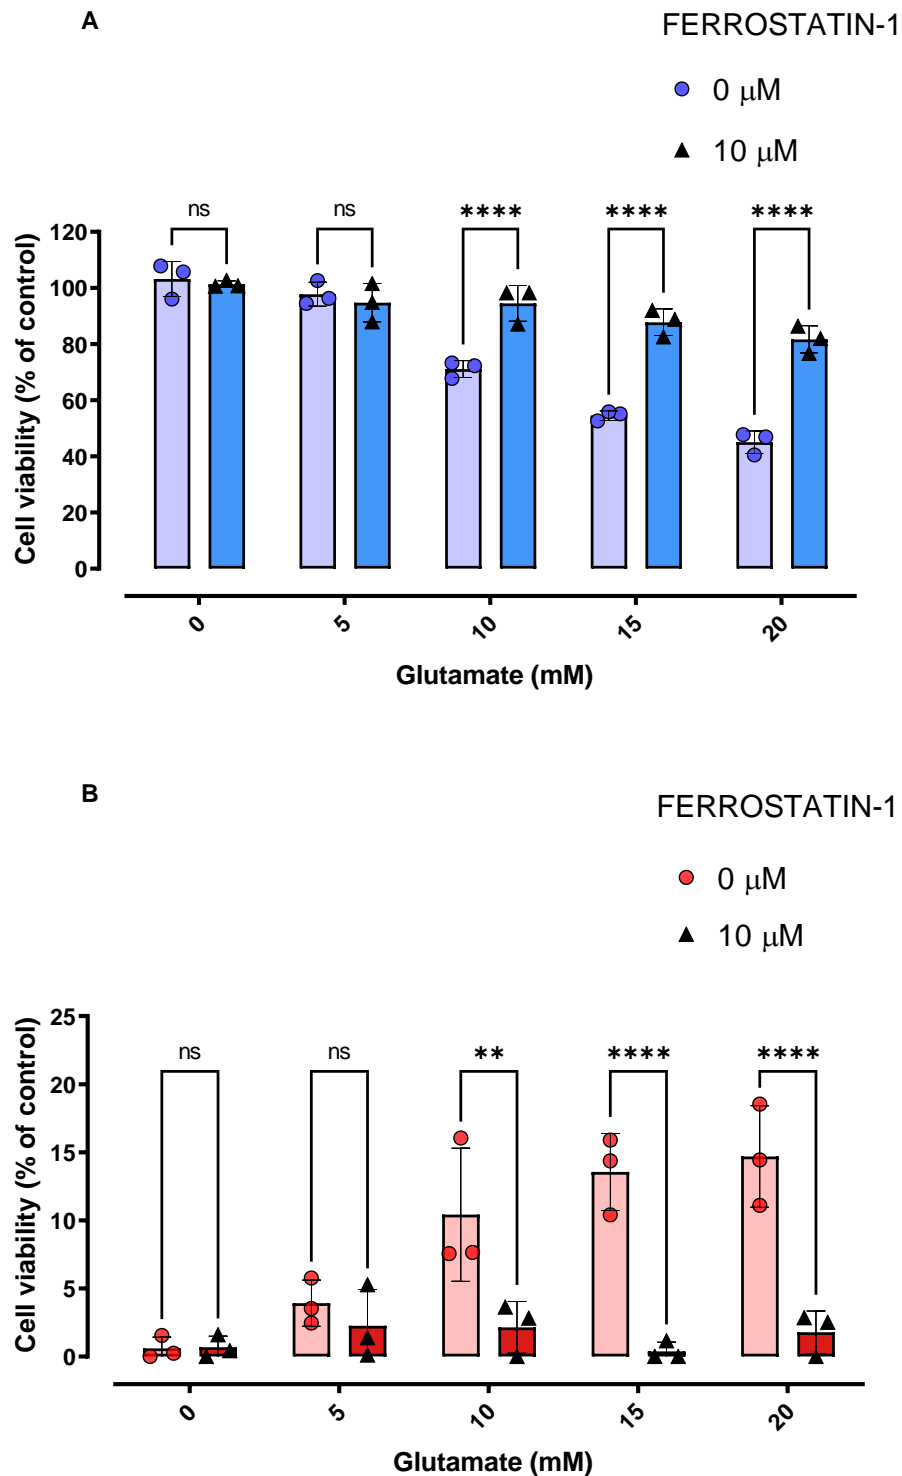

**Supplementary Figure S2. Ferrostatin-1 protected against glutamate-induced cell death.** In order to investigate parallel cell death mechanisms that could be co-acting with glutamate-induced ferroptosis, HT22 cells were pre-treated with 10  $\mu$ M ferrostatin-1 (classic ferroptosis inhibitor) for 30 min and then exposed to 5, 10, 15 and 20 mM glutamate for 24 h. The figure shows significant impairment of metabolic cell viability (A - MTT assay) and increased cell death (B - PI assay) induced by 10, 15 and 20 mM glutamate. These effects were

greatly decreased by pre-treatment with ferrostatin-1, evidencing ferroptosis as the main mechanism of cell death in our paradigms. In B, 100% cell death is represented by cells treated with 0.2% Triton X-100 for 20 minutes. ns: not significant; \*\* $p < 0.01$ ; \*\*\*\* $p < 0.0001$  compared to control group (untreated cells). n=3.
